# Supplementary material for: High performance broadband acoustic absorption and sound sensing of a bubbled graphene monolith
Source: Royal Society of Chemistry journal article supplement (doi:10.1039/c9ta02306b), 2019-01-01
Supplement: c9ta02306b1.pdf [file c9ta02306b1.pdf]

## Supporting Information

# High Performance Broadband Acoustic Absorption and Sound Sensing of Bubbled Graphene Monolith

Bing Lu, Lingxiao Lv, Hongsheng Yang, Jian Gao, Tong Xu, Guoqiang Sun, Xuting

Jin, Changxiang Shao, Liangti Qu\* and Jun Yang\*

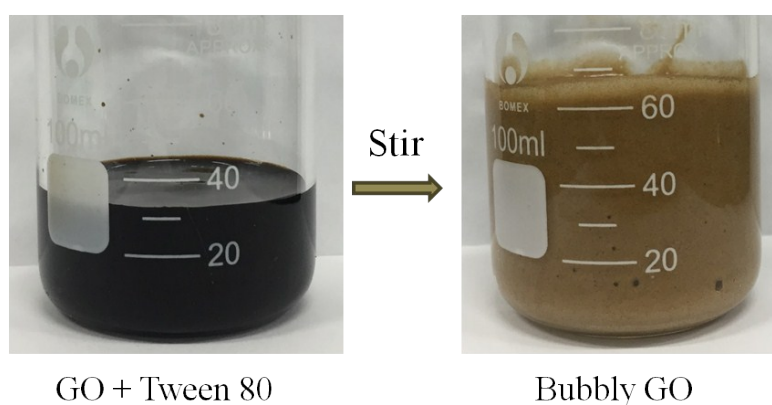

**Figure S1.** Photographs of the 7 mg mL<sup>-1</sup> GO dispersion with Tween 80 (left) and as-made bubbly GO dispersion with about two times volume expansion (right).

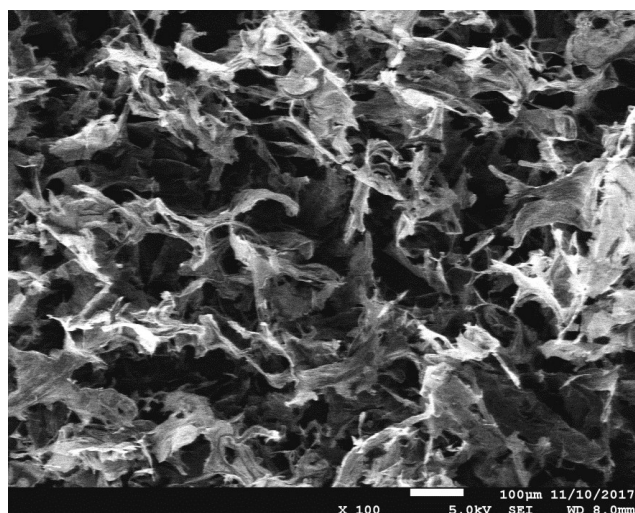

**Figure S2.** SEM image of normal graphene foam without bubble template.

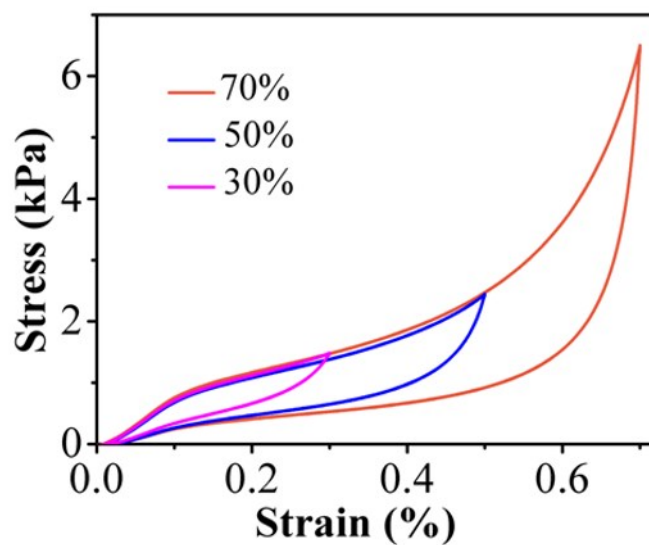

**Figure S3.** The stress-strain curves of BGM at small compressive strains.

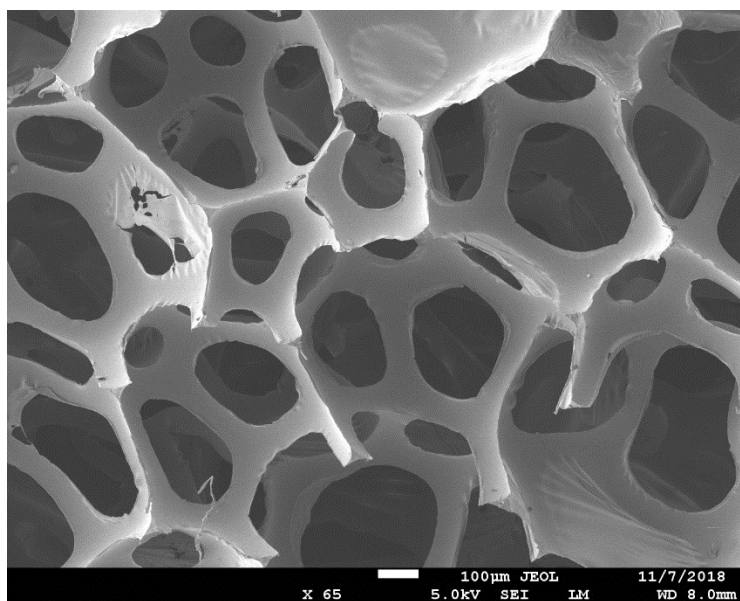

**Figure S4.** SEM image of commercial PU foam.

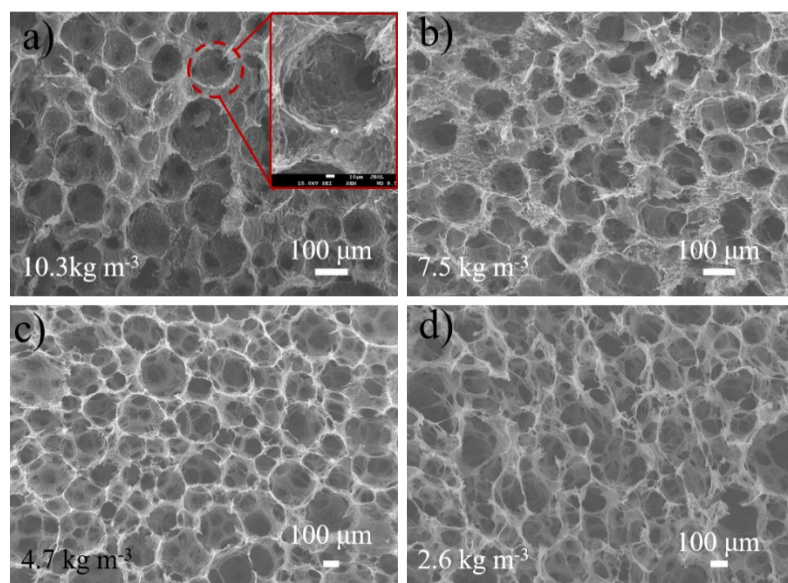

**Figure S5.** a-d) SEM images of BGMs with different performance density range from 2.6 to 10.3 kg m<sup>-3</sup>.

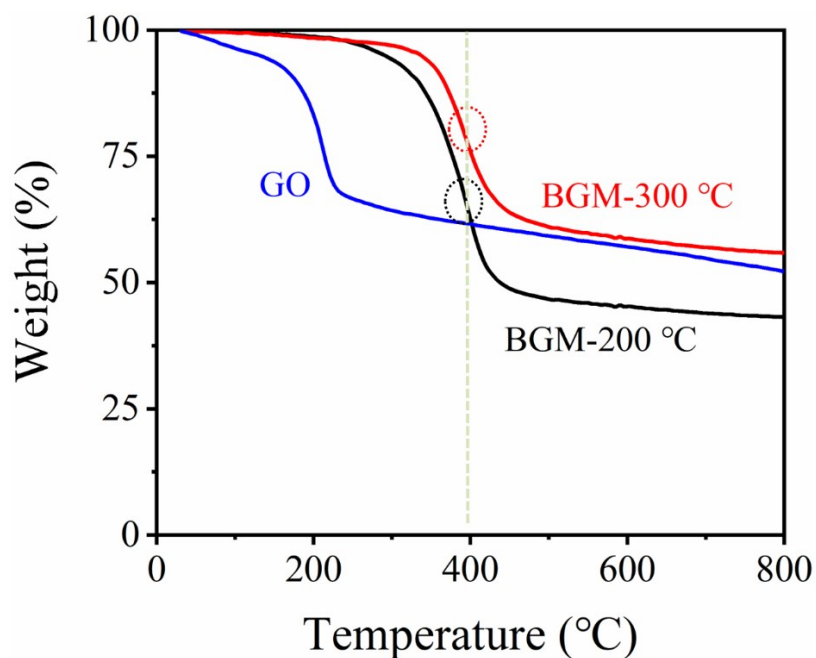

**Figure S6.** TGA curve of GO and BGMs annealed under different temperature (N<sub>2</sub> atmosphere). Pyrolysis of Tween 80 occurred at about 400 °C.

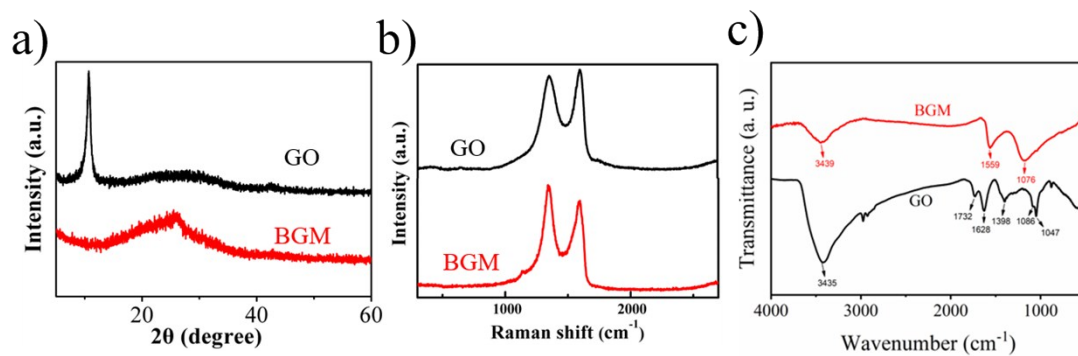

**Figure S7.** a) XRD patterns, b) Raman spectra and c) FTIR spectra of GO and BGM annealed in 300 °C.

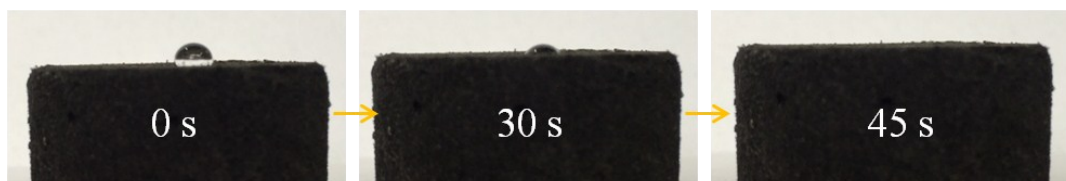

**Figure S8.** Photographs of the wettability for BGM annealed under 200°C: water drop could be absorbed completely within 45 s.

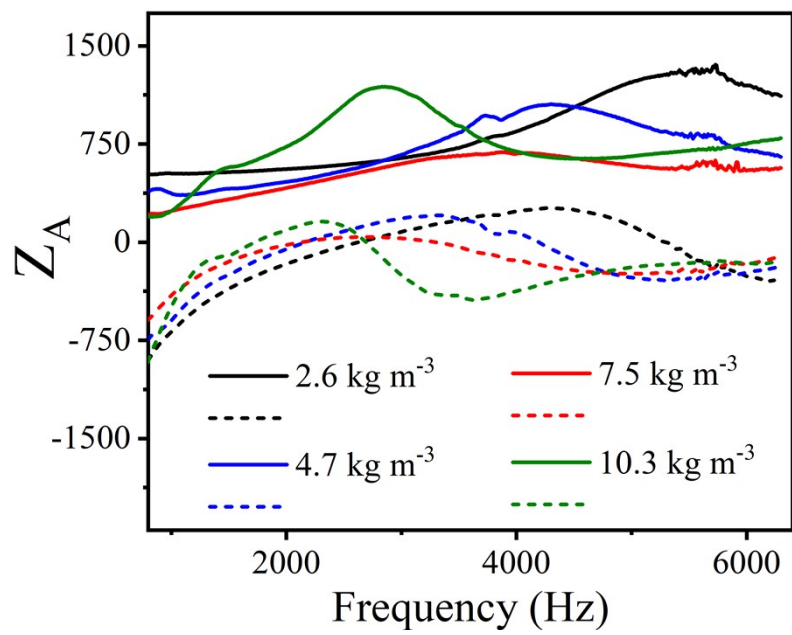

**Figure S9.** Impedance for BGMs with different density.

**Table S1.** Comparison of density, thickness, porosity, acoustic activity and flow resistivity for BGM with commercial acoustic absorption material or absorption materials reported previously.

| <i>Name</i>            | <i>Density</i><br>( $kg\ m^{-3}$ ) | <i>Thickness</i><br>( $mm$ ) | <i>Porosity</i><br>(%) | $\alpha_n$   | <i>Flow resistivity</i><br>( $Pa\ s\ m^{-2}$ ) | <i>Re.</i> |
|------------------------|------------------------------------|------------------------------|------------------------|--------------|------------------------------------------------|------------|
| <b>This work</b>       | <b>7.5</b>                         | <b>50</b>                    | <b>99.7</b>            | <b>0.901</b> | 55200                                          |            |
| PU foam                | 20                                 | 50                           | 96.0                   | 0.810        | 30000                                          |            |
| Normal G foam          | 7.5                                | 50                           | 99.7                   | 0.823        | 41245                                          |            |
| Wood fibers in PU foam | 72                                 | 20                           | 65.1                   | 0.756        | 18000                                          | 1          |
| Needled nonwovens      | 110                                | 11                           | 89.4                   | 0.601        | 83584                                          | 2          |
| PU/CNT foam            | 27                                 | 30                           | 95.0                   | 0.862        | 5717±740                                       | 3          |
| Melamine/GO foam       | 247                                | 26                           | -                      | 0.824        | 40932                                          | 4          |
| Cigarette filters      | 93                                 | 50                           | 95.9                   | 0.893        | 21314                                          | 5          |
| Glass fibers           | 115                                | 30                           | 95.4                   | 0.832        | 10468                                          | 6          |
| Al foam                | 400                                | 24                           | 88-90                  | 0.744        | -                                              | 7          |
| Metal fiber            | -                                  | 48                           | 90.9                   | 0.896        | 18980                                          | 8          |
| Rice hull in PU foam   |                                    | 40                           |                        | 0.695        | -                                              | 9          |

**Table S2.** Normalized absorption coefficients of BGMs with different densities and thicknesses.

| Name                                        | $\alpha_n$ | Flow resistivity<br>(Pa s m <sup>-2</sup> ) |
|---------------------------------------------|------------|---------------------------------------------|
| 7.5 kg m <sup>-3</sup> -10 mm (800-6300 Hz) | 0.793      | 55200                                       |
| 7.5 kg m <sup>-3</sup> -20 mm (800-6300 Hz) | 0.867      | 55200                                       |
| 7.5 kg m <sup>-3</sup> -30 mm (800-6300 Hz) | 0.919      | 55200                                       |
| 7.5 kg m <sup>-3</sup> -40 mm (800-6300 Hz) | 0.934      | 55200                                       |
| 7.5 kg m <sup>-3</sup> -50 mm (800-6300 Hz) | 0.927      | 55200                                       |
| 7.5 kg m <sup>-3</sup> -40 mm (60-6300 Hz)  | 0.882      | 55200                                       |
| 7.5 kg m <sup>-3</sup> -50 mm (60-6300 Hz)  | 0.901      | 55200                                       |
| 30 mm-2.6 kg m <sup>-3</sup> (800-6300 Hz)  | 0.794      | 19800                                       |
| 30 mm-4.7 kg m <sup>-3</sup> (800-6300 Hz)  | 0.864      | 33800                                       |
| 30 mm-7.5 kg m <sup>-3</sup> (800-6300 Hz)  | 0.919      | 55200                                       |
| 30 mm-10.3 kg m <sup>-3</sup> (800-6300 Hz) | 0.740      | 98790                                       |

**Table S3.** Comparison of acoustic absorption coefficients for BGM with other commercial acoustic absorbers used in building structures.<sup>10 11 12</sup>

| Materials                    | Thickness<br>(mm) | Acoustic absorption coefficient |             |             |             |             |
|------------------------------|-------------------|---------------------------------|-------------|-------------|-------------|-------------|
|                              |                   | 500 Hz                          | 1000 Hz     | 2000 Hz     | 4000 Hz     | 6000 Hz     |
| <b>Our work</b>              | <b>50</b>         | <b>0.72</b>                     | <b>0.90</b> | <b>0.92</b> | <b>0.95</b> | <b>0.95</b> |
| Melamine foam                | 26                | 0.22                            | 0.42        | 0.62        | 0.83        | -           |
| Polyurethane foam $\alpha_0$ | 40                | 0.2                             | 0.59        | 0.68        | 0.85        | -           |
| Cocos fiber roll felt        | 29                | 0.22                            | 0.35        | 0.47        | 0.57        | -           |
| Rock wool                    | 50                | 0.92                            | 0.90        | 0.88        | 0.88        | -           |
| Wood                         | 16                | 0.10                            | 0.09        | 0.08        | 0.07        | -           |
| Aluminum foam                | 20                | 0.13                            | 0.22        | 0.52        | -           | -           |
| Acoustical plaster           | 25                | 0.66                            | 0.65        | 0.62        | 0.68        | -           |
| Natural coir fiber           | 30                | 0.28                            | 0.84        | 0.73        | 0.82        | -           |
| Extra-fine glass wool        | 30                | 0.38                            | 0.89        | 0.81        | 0.98        | -           |
| Mineral cotton               | 80                | 0.65                            | 0.75        | 0.88        | 0.92        | -           |
| Petate                       | 30                | 0.63                            | 0.72        | 0.90        | 0.97        | -           |



## Reference

1. H. Choe, G. Sung and J. H. Kim, *Compos. Sci. Technol.* 2018, **156**, 19-27.
2. P. Soltani, M. Azimian, A. Wiegmann and M. Zarrebini, *J. Sound Vib.*, 2018, **426**, 1-18.
3. A. Hasani Baferani, A. A. Katbab and A. R. Ohadi, *Eur. Polym. J.*, 2017, **90**, 383-391.
4. Z. Wang, B. Lu, X. Meng, C. Zhao, L. Huang, Z. Liu, C. Yu and J. Qiu, *Electrochim. Acta*, 2017, **252**, 84-90.
5. R. Maderuelo-Sanz, V. Gómez Escobar and J. M. Meneses-Rodríguez, *Appl. Acoust.*, 2018, **129**, 86-91.
6. Z. Sun, Z. Shen, S. Ma and X. Zhang, *Mater. Struct.*, 2013, **48**, 387-392.
7. T. G. Zieliński, M. Potoczek, R. E. Śliwa and Ł. J. Nowak, *Arch. Acoust.*, 2013, **38**, 495-502.
8. Z. Bo and C. Tianning, *Appl. Acoust.*, 2009, **70**, 337-346.
9. Y. Wang, C. Zhang, L. Ren, M. Ichchou, M.-A. Galland and O. Bareille, *Polym. Compos.*, 2013, **34**, 1847-1855.
10. T. J. Lu, F. Chen and D. P. He, *J. Acoust. Soc. Am.*, 2000, **108**, 1697-1709.
11. M. H. Fouladi, M. Ayub and M. J. M. Nor, *Appl. Acoust.*, 2011, **72**, 35-42.
12. V. M. Auralization, Springer Publishing Company, Incorporated, **2008**.
